# Supplementary material for: Compliant substratum guides endothelial commitment from human pluripotent stem cells
Source: PubMed Central journal article supplement — Sci Adv. 2017 May 31;3(5):e1602883. doi: 10.1126/sciadv.1602883 (PMC5451190; doi:10.1126/sciadv.1602883), 2017-05-31
Supplement: 1602883_SM.pdf [file 1602883_SM.pdf]

## Supplementary Materials for

### **Compliant substratum guides endothelial commitment from human pluripotent stem cells**

Quinton Smith, Xin Yi Chan, Ana Maria Carmo, Michelle Trempel, Michael Saunders, Sharon Gerecht

Published 31 May 2017, *Sci. Adv.* **3**, e1602883 (2017)

DOI: 10.1126/sciadv.1602883

#### **This PDF file includes:**

- fig. S1. Development of compliant PDMS substrates.
- fig. S2. Differentiation and proliferation are supported on compliant silicone substrates.
- fig. S3. PDGFR- $\beta$  expression from mesodermal differentiation in serum.
- fig. S4. Immunofluorescence microscopy of mature EC markers after mesoderm stiffness priming.
- fig. S5. Differentiation and proliferation are supported on compliant silicone substrates in serum-free conditions.
- fig. S6. PDGFR- $\beta$  expression from mesodermal differentiation in serum-free conditions.
- fig. S7. Immunofluorescence microscopy of EC markers after chemically defined mesoderm stiffness priming.
- fig. S8. Immunofluorescence microscopy of EC markers after chemically defined mesoderm stiffness priming.
- table S1. Literature review of techniques to induce mesodermal specification from hiPSCs.
- table S2. Antibodies used in this study.
- References (41, 42)

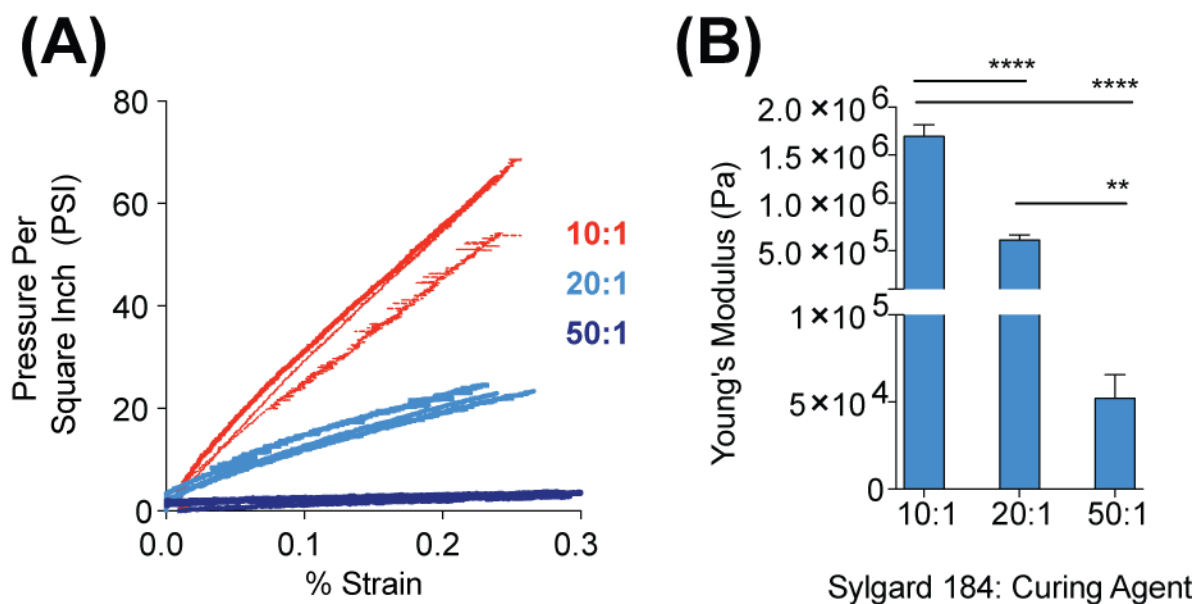

**fig. S1. Development of compliant PDMS substrates.** (A) Stress-strain curves for three different PDMS formulations from three independent experiments (n=3). (B) Calculated Young's Modulus of PDMS substrates as a function of the weight percent between elastomeric base and curing agent. \*p<0.05, \*\*p<0.01, \*\*\*p<0.001 and \*\*\*\*p<0.0001.

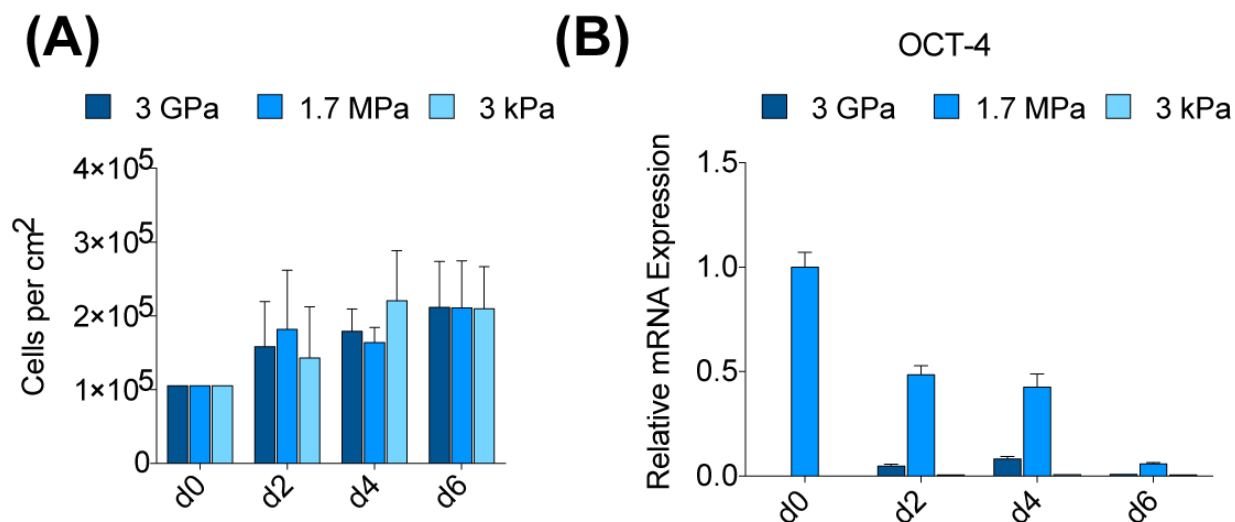

**fig. S2. Differentiation and proliferation are supported on compliant silicone substrates.** (A) Growth kinetics as a function of substrate stiffness. (B) Representative PCR analysis of mRNA expression from biological triplicates showing loss of self-renewal maker *OCT-4* for hiPSCs differentiated for six days on PDMS and E ~ 3 GPa surfaces. Differentiation kinetics normalized to *OCT-4* expression of undifferentiated hiPSCs (day 0).

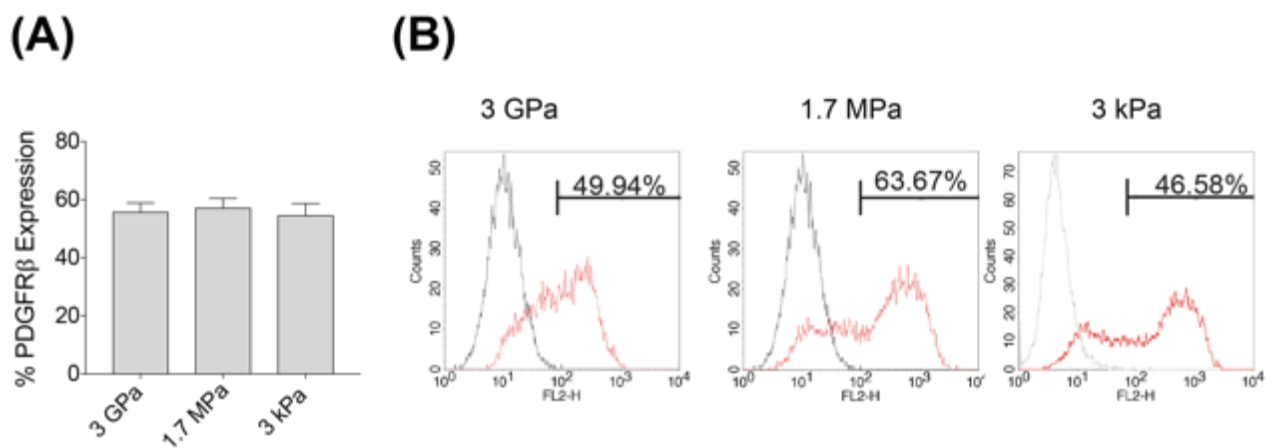

**fig. S3. PDGFR- $\beta$  expression from mesodermal differentiation in serum. (A)** Average PDGFR- $\beta$  expression as a function of substrate stiffness on day 12. **(B)** Representative flow cytometry histogram plots of PDGFR- $\beta$  expression. Data are represented as mean  $\pm$  S.E.M. from at least three independent differentiations.

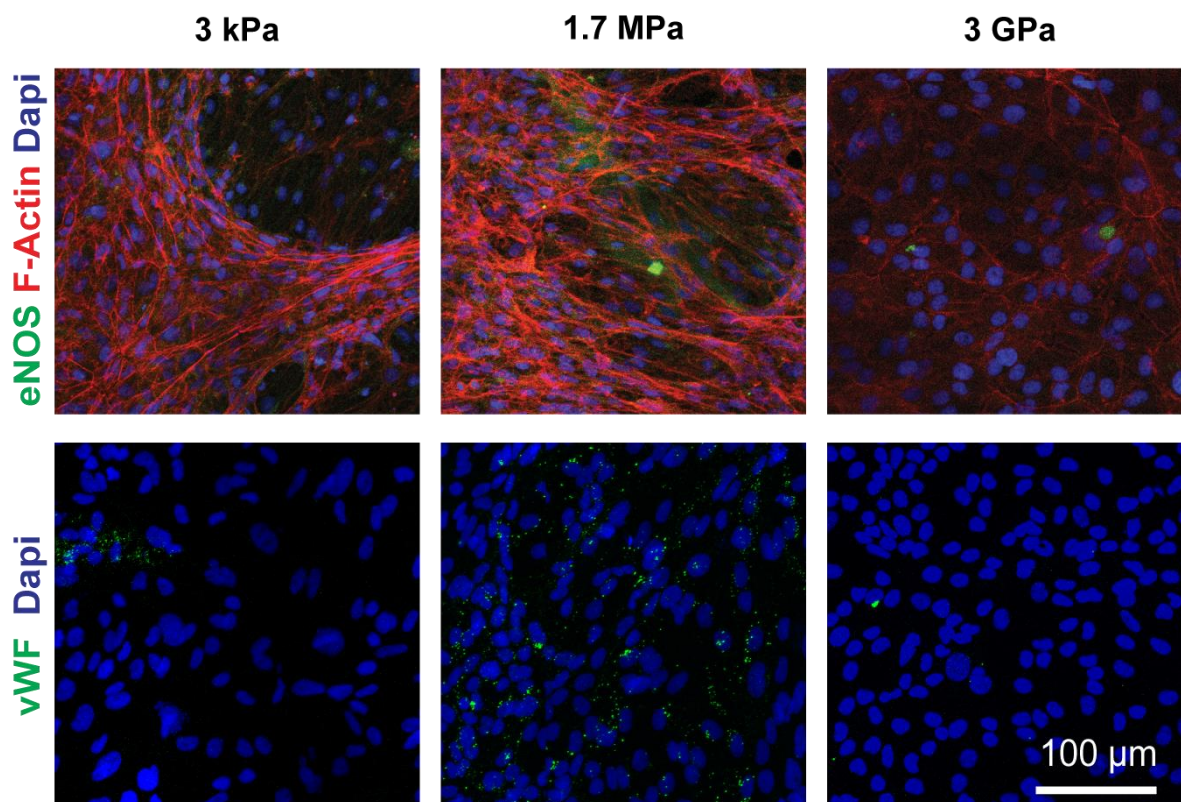

**fig. S4. Immunofluorescence microscopy of mature EC markers after mesoderm stiffness priming.** Representative immunofluorescent images of day 12 EVCs primed on compliant PDMS

substrates as well as E ~ 3 GPa (eNOS and vWF expression in green; F-actin in red; and nuclei in blue). At least three biological replicates were preformed.

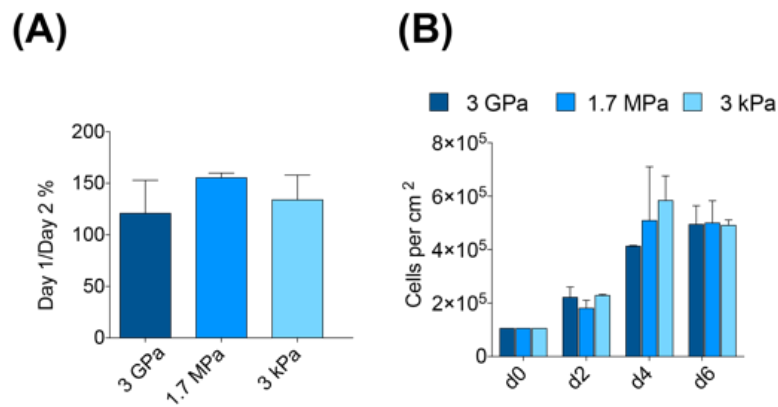

**fig. S5. Differentiation and proliferation are supported on compliant silicone substrates in serum-free conditions. (A)** Attachment efficiency across varied substrates in serum free conditions. **(B)** Cell counts during differentiation. Data are represented as mean ± S.E.M. from at least three independent differentiations.

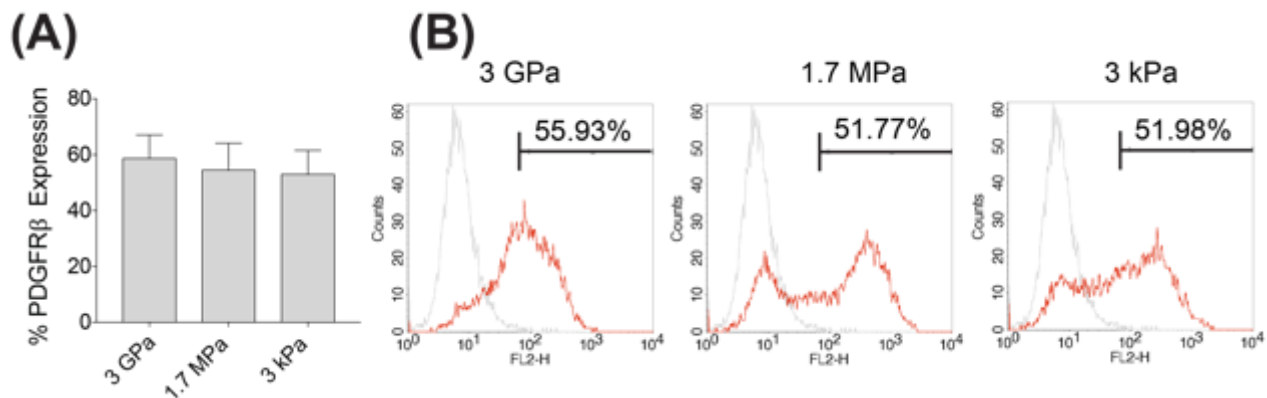

**fig. S6. PDGFR-β expression from mesodermal differentiation in serum-free conditions. (A)** Average PDGFR-β expression as a function of substrate stiffness on day 12. **(B)** Representative flow cytometry histogram plots of PDGFR-β expression. Data are represented as mean ± S.E.M. from at least three independent differentiations.

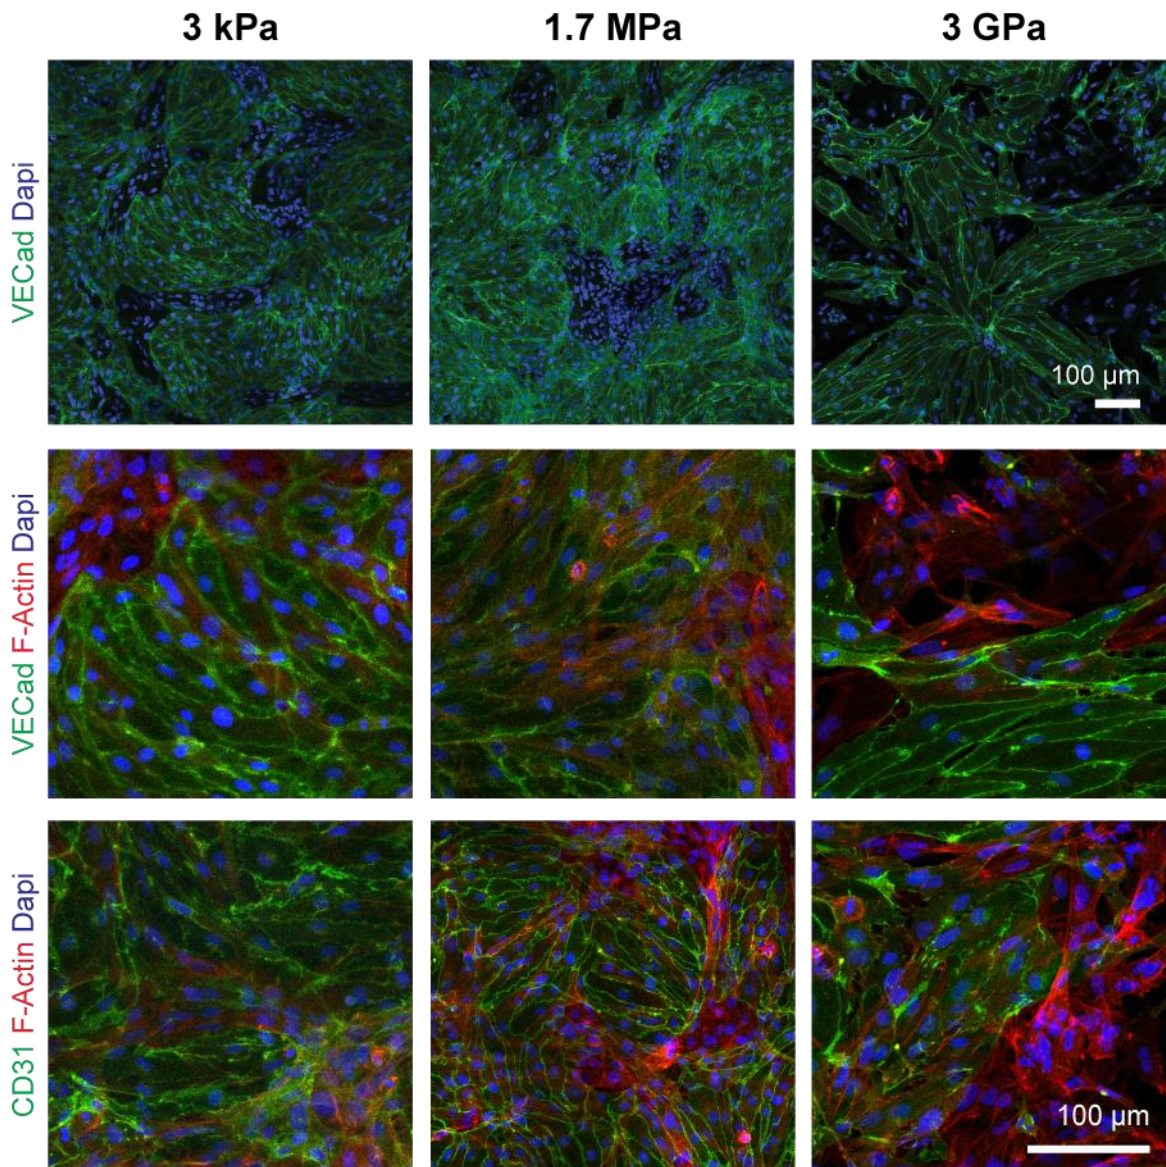

**fig. S7. Immunofluorescence microscopy of EC markers after chemically defined mesoderm stiffness priming.** Representative low magnification immunofluorescent images of VECad (green) and nuclei (blue) of day 12 EVCs primed on compliant PDMS substrates as well as E ~ 3 GPa substrates (**top**). High magnification images of VECad (green; **middle**) and CD31 (green; **bottom**) as well as F-actin (red) and nuclei (blue). At least three biological replicates were preformed.

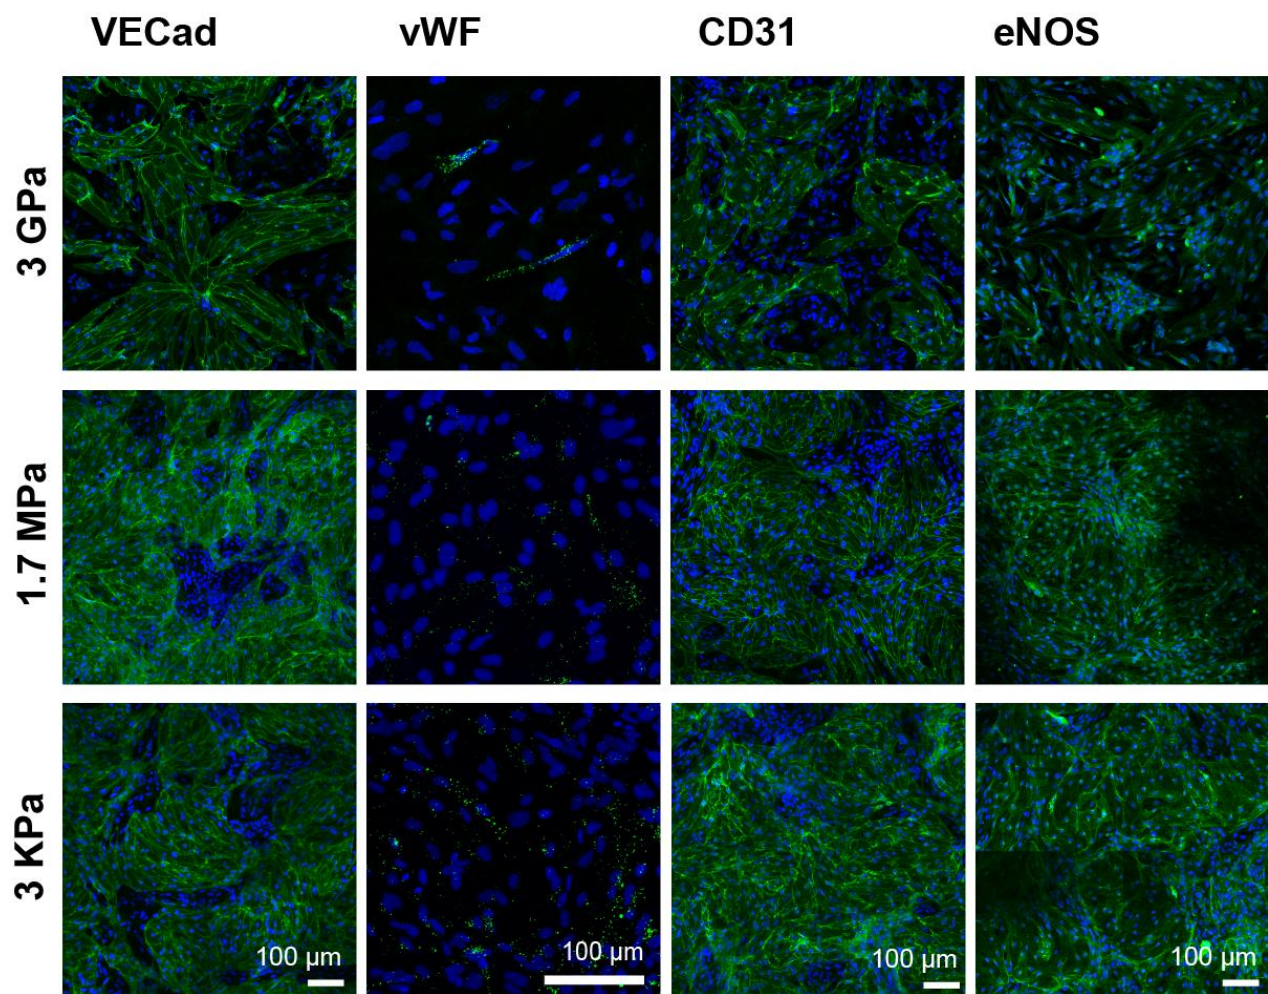

**fig. S8. Immunofluorescence microscopy of EC markers after chemically defined mesoderm stiffness priming.** Representative immunofluorescent images of day 12 EVCs primed on compliant PDMS substrates as well as  $E \sim 3$  GPa substrates for the expression and localization of VECad, vWF, CD31 and eNOS (all in green; nuclei in blue).

**table S1. Literature review of techniques to induce mesodermal specification from hiPSCs.**

| Mesoderm Induction                                                                                                                                                                                                        | Days (D) | EC Differentiation Media                                                                 | EC Differentiation Efficiency                              | Reference |
|---------------------------------------------------------------------------------------------------------------------------------------------------------------------------------------------------------------------------|----------|------------------------------------------------------------------------------------------|------------------------------------------------------------|-----------|
| 30 ng/mL BMP-4, 25 ng/mL Activin A, 1.5 $\mu$ M CHIR 99021                                                                                                                                                                | D:1-3    | BPEL (bovine serum albumin (BSA) (without PVA), VEGF165 (50 ng/mL), B43152 (10 $\mu$ M)  | 10-30% CD31+CD34+                                          | 12        |
| LaSR basal medium (advanced DMEM/F12, 2.5 mM Glutamax, 60 $\mu$ g/mL ascorbic acid), 6-10 $\mu$ M CHIR99021                                                                                                               | D: 0 - 2 | CD34+ purified Collagen IV coated dishes, EGM-2 medium (Lonza)                           | > 50% CD34+CD31+ EPCs                                      | 36        |
| mTeSR1 media, activin A (10 ng/mL), FGF-2 (10 ng/mL), VEGF,165 (10 ng/mL), and BMP4 (10 ng/mL)                                                                                                                            | D: 1     | Stemline II, FGF-2, VEGF,165, BMP4 (10ng/mL), - SB43152                                  | CD31+-.CD144+-. KDR+- and NRP-1+-                          | 13        |
| +/- Y-27632 (10 $\mu$ M), aMEM, 10% FBS, .1% BME                                                                                                                                                                          | D: 0-6   | EGM (Promocell) VEGF,165 (50 ng/mL), SB43152 (10 $\mu$ M)                                | 20-50%                                                     | 24,26     |
| N1B27 medium (1:1 mixture of DMEM:F12 (1:1) with Glutamax and Neurobasal media with N2 and B27 (life technologies), BMP4 ( 25 ng/mL). VEGF (200 ng/mL), CHIR99021 (8 $\mu$ M)/ CP21 (1 $\mu$ M) and forskolin (2 $\mu$ M) | D: 0-4   | StemPro-34 SFM, VEGF (50 ng/mL)                                                          | 35% CD144+                                                 | 39        |
| DMEM F-12 basal media, Activin A (2 ng/mL), CHIR99021 (3 $\mu$ M)                                                                                                                                                         | D: 0-2   | Basal media, poly(vinyl) alcohol (2mg/ml), with mVEGF-A (20 ng/mL) or hVEGF-A (10 ng/ml) | 35% CD31+(control) to > 95% CD31+ (via selective adhesion) | 41        |
| DMEM/F12 basal media, CHIR99021 (4 $\mu$ M), VEGF, Activin A, BMP-4 (5 ng/mL)                                                                                                                                             | D:0-4    | Endothelial basal media (EGM), bFGF (5 ng/mL), VEGF-A (10 ng/mL)                         | > 80% CD31+/CD144+                                         | 42        |

**table S2. Antibodies used in this study.** IF = immunofluorescence; FC = flow cytometry

| <b>Antibody</b> | <b>Source</b>     | <b>Catalog #</b> | <b>Purpose</b> | <b>Host Species &amp; Reactivity</b> | <b>Working Concentration</b> |
|-----------------|-------------------|------------------|----------------|--------------------------------------|------------------------------|
| Dapi            | Roche             | 10236276         | IF             | Nucleus                              | 1:10,000                     |
| AlexaFluor 488  | Life Technologies | A-11008          | IF             | Goat anti-rabbit                     | 1:1,000                      |
| AlexaFluor 546  | Life Technologies | A-10036          | IF             | Donkey anti-mouse                    | 1:1,000                      |
| AlexaFluor 647  | Life Technologies | A-31573          | IF             | Donkey anti-rabbit                   | 1:1,000                      |
| VECAD-PE        | BD                | 560410           | FC             | Mouse anti-human                     | 1:10                         |
| VECAD (F-8)     | Santa Cruz        | Sc-9989          | IF             | Mouse polyclonal                     | 1:100                        |
| vWF (H-300)     | Santa Cruz        | Sc-14014         | IF             | Rabbit polyclonal                    | 1:100                        |
| YAP/TAZ         | Santa-Cruz        | Sc-271134        | IF             | Mouse monoclonal                     | 1:100                        |
| eNOS            | BD                | 610297           | IF             | Mouse anti-human                     | 1:100                        |
| PECAM-1/CD31    | Dako              | MO823            | IF             | Mouse anti-human                     | 1:100                        |
